# Supplementary material for: Osteopontin isoform c promotes the survival of cisplatin-treated NSCLC cells involving NFATc2-mediated suppression on calcium-induced ROS levels
Source: PubMed Central journal article supplement (PMC8243455; doi:10.1186/s12885-021-08495-z), 2021-06-29
Supplement: 12885_2021_8495_MOESM1_ESM.pdf [file 12885_2021_8495_MOESM1_ESM.pdf]

**Suppl Table 1** The qPCR primers used in this study

---

| <b>Target</b> | <b>Oligonucleotide sequence</b> |
|---------------|---------------------------------|
| CYP2E1        | F: GAAGCAACCCGAGACACCAT         |
|               | R: CACTCGTTTTCTGTGGA            |
| CYBB          | F: AAGTGCCCAAAGGTGTCAA          |
|               | R: CCCATCAACCGCTATCTTAGGT       |
| RAC2          | F: TGGCCAAGGAGATTGACTCGG        |
|               | R: GCCTCGTCGAACACGGTTT          |
| ATP6V0C       | F: CCAACGCTGCGGAGATCCA          |
|               | R: CCCATGACGGCGAAAAACG          |
| TRADD         | F: CGGAGTAGAGCGGAGCCT           |
|               | R: CTGCCATCTCACCTCCTGGC         |
| MAFK          | F: TTCCAGGGAGCTCTGTCCT          |
|               | R: CCCGCCTCCTTCTTGACCTTT        |
| MAFG          | F: GCCTCCTATCAGAGAGCGCC         |
|               | R: GATCTCCTCCTTGGACAGGC         |
| ATP6V0D2      | F: TCGAAACGCCATTAGCTCCAT        |
|               | R: TGTCGGCCTCAAACCTCAAGA        |
| ALCAM         | F: ACTTGACGTACCTCAGAATCTCA      |
|               | R: CATCGTCGTACTIONGCACACTTT     |
| ATP6V1H       | F: CCGAGGATTCGCGAGATTTG         |
|               | R: CACGAACTTCTGCAGCCTTG         |
| GPX8          | F: CCCAGAGCAAAGGTATTTGCAG       |
|               | R: TTTACAACCTAGTGAACTTTGCCTT    |
| SOX2          | F: GCCGAGTGGAACCTTTTGTGCG       |
|               | R: GGCAGCGTGTACTTATCCTTCT       |
| NFATc2        | F: AGAATCCATCCTGCTGGTTC         |
|               | R: TCCATGTAGCCATGGAGCTG         |
| GAPDH         | F: GGAGCGAGATCCCTCCAAAAT        |
|               | R: GGCTGTTGTCATACTTCTCATGG      |

---

**Suppl Table 2** The constructed gene set of ROS metabolism

| Genes                                                                                                                                                                                                                                                                                                        | Reference                                                         |
|--------------------------------------------------------------------------------------------------------------------------------------------------------------------------------------------------------------------------------------------------------------------------------------------------------------|-------------------------------------------------------------------|
| GCLC, GCLM, GGT1, GPX1, GPX2, GPX3, GSR, GSTA2, GSTA3, GSTA4, GSTM1, GSTM2, GSTM3, GSTM4, GSTM5, GSTP1, GSTT1, GSTZ1, IDH1, MGST2, MGST3, NCF1C                                                                                                                                                              | GSEA (ROS metabolism)                                             |
| ATOX1, CAT, CDO1, DUSP1, GOT1, GPX1, GPX2, GPX3, GPX4, MPO, NUDT1, PDLIM1, PRDX6, SDS, SELENOP, SOD1                                                                                                                                                                                                         | GSEA (ROS (glutathione, ox stress))                               |
| ATP6V0A1, ATP6V0A2, ATP6V0A4, ATP6V0B, ATP6V0C, ATP6V0D1, ATP6V0D2, ATP6V0E1, ATP6V0E2, ATP6V1A, ATP6V1B1, ATP6V1B2, ATP6V1C1, ATP6V1C2, ATP6V1D, ATP6V1E1, ATP6V1E2, ATP6V1F, ATP6V1G1, ATP6V1G2, ATP6V1G3, ATP6V1H, CYBA, CYBB, HVCN1, LPO, MPO, NCF1, NCF2, NCF4, NOS1, NOS2, NOS3, RAC2, SLC11A1, TCIRG1 | GSEA (ROS and RNS production in phagocytes)                       |
| GPX8                                                                                                                                                                                                                                                                                                         | Ramming T, et al. Free Radic Biol Med. 2014, 70: 106-16.          |
| ALDH1A1                                                                                                                                                                                                                                                                                                      | Lei HM, et al. Theranostics. 2019, 9(24): 7122-7139.              |
| CYP2E1                                                                                                                                                                                                                                                                                                       | Lu Y, et al. Curr Pharm Des. 2018;24(14): 1502-1517.              |
| FOXO3                                                                                                                                                                                                                                                                                                        | Shang J, et al. Biochem Biophys Res Commun. 2020,533(4): 723-731. |
| FOXO1                                                                                                                                                                                                                                                                                                        | Li K, et al. Stem Cell Res Ther. 2020, 11(1): 131.                |
| MAFK                                                                                                                                                                                                                                                                                                         | Zhang T, et al. J Cell Physiol. 2019;234(3): 2511-2522.           |
| MAFG                                                                                                                                                                                                                                                                                                         | Zhang T, et al. J Cell Physiol. 2019, 234(3): 2511-2522.          |
| TRADD                                                                                                                                                                                                                                                                                                        | Kim JJ, et al. Cell Death Differ. 2010, 17(9): 1420-34.           |
| SOX2                                                                                                                                                                                                                                                                                                         | Liang Y, et al. Immun Inflamm Dis. 2020. doi: 10.1002/iid3.388.   |
| ALCAM                                                                                                                                                                                                                                                                                                        | Ishimoto T, et al. Cancer Cell. 2011, 19(3): 387-400.             |

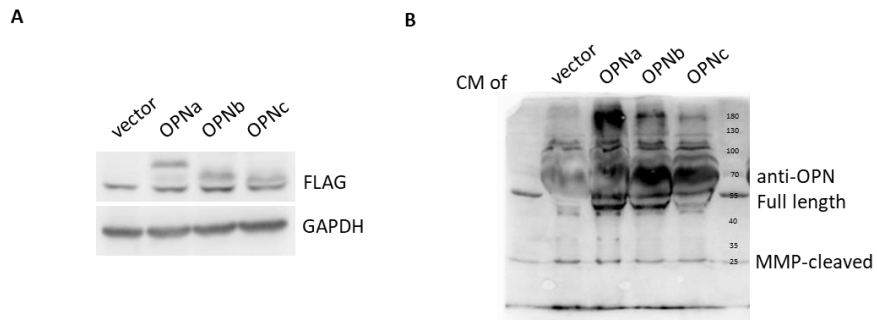

**Suppl Figure 1.** Western blot of OPN proteins in CMs from OPN-SIs overexpressing cells. **a** Cell lysate of transfected HEK-293T cells. **b** CMs collected from transfected HEK-293T cells.

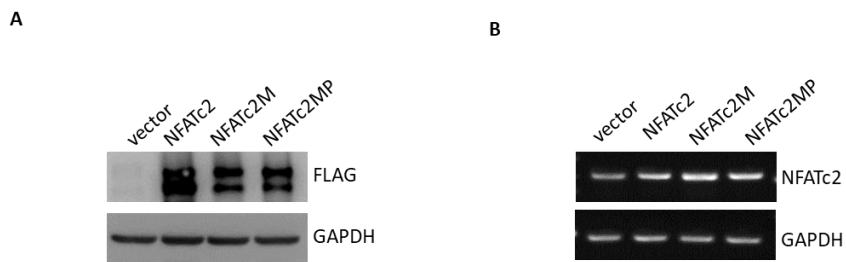

**Suppl Figure 2.** NFATc2 and its mutants were overexpressed in H1299 cells. **a** The protein levels of Flag-NFATc2 and its mutants were determined by western blotting in H1299 cells. **b** The mRNA levels of Flag-NFATc2 and its mutants were determined by RT-PCR in H1299 cells.

Suppl Figure 3 (Original images to Figure 3C)

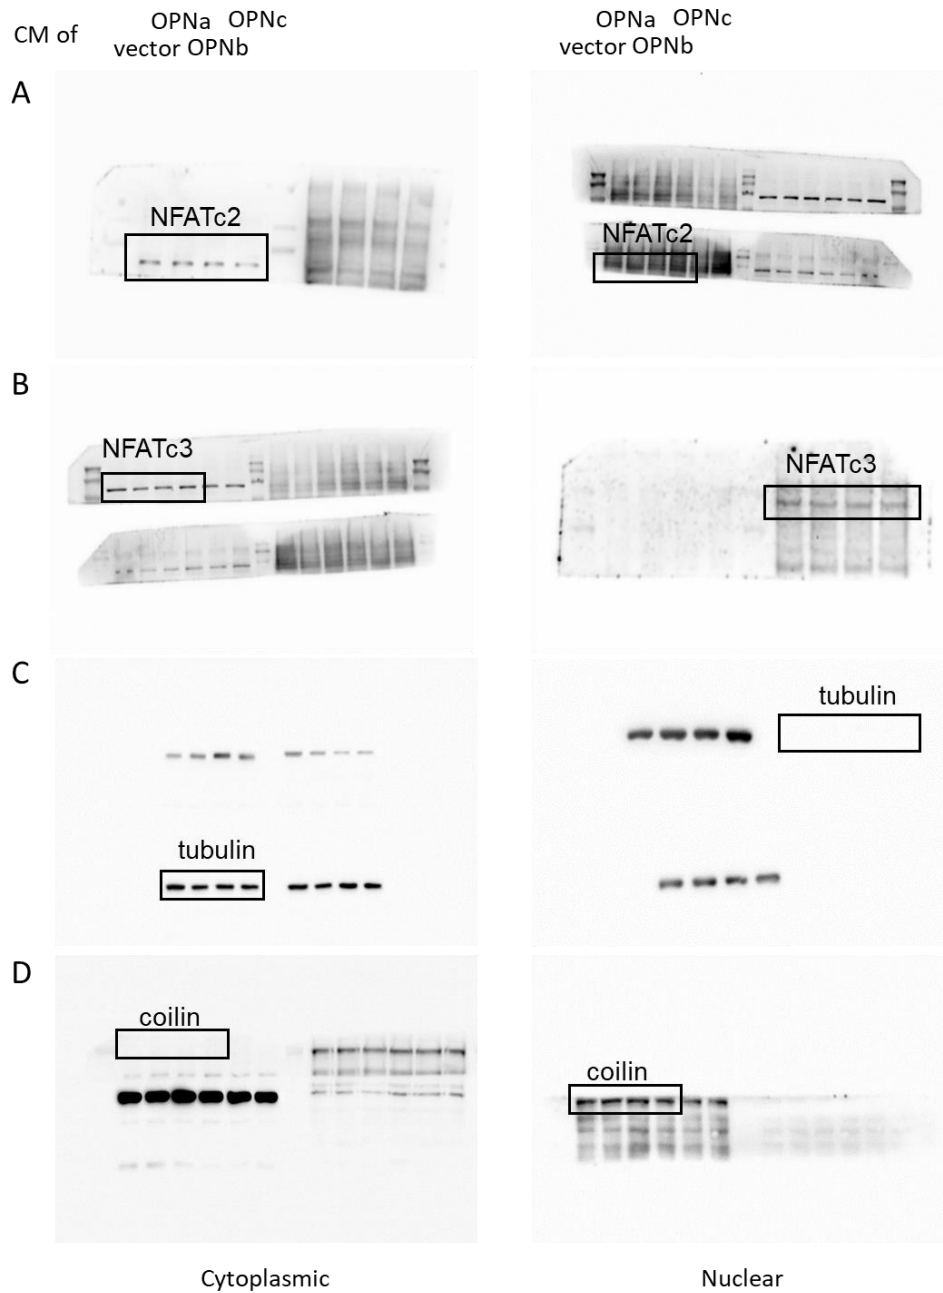

**Suppl Figure 3 (Original images to Figure 3C).** (A) Original image to Figure 3C-NFATc2. (B) Original image to Figure 3C-NFATc3. (C) Original image to Figure 3C-tubulin. (D) Original image to Figure 3C-coilin.

Suppl Figure 4 (Original images to Figure 3D)

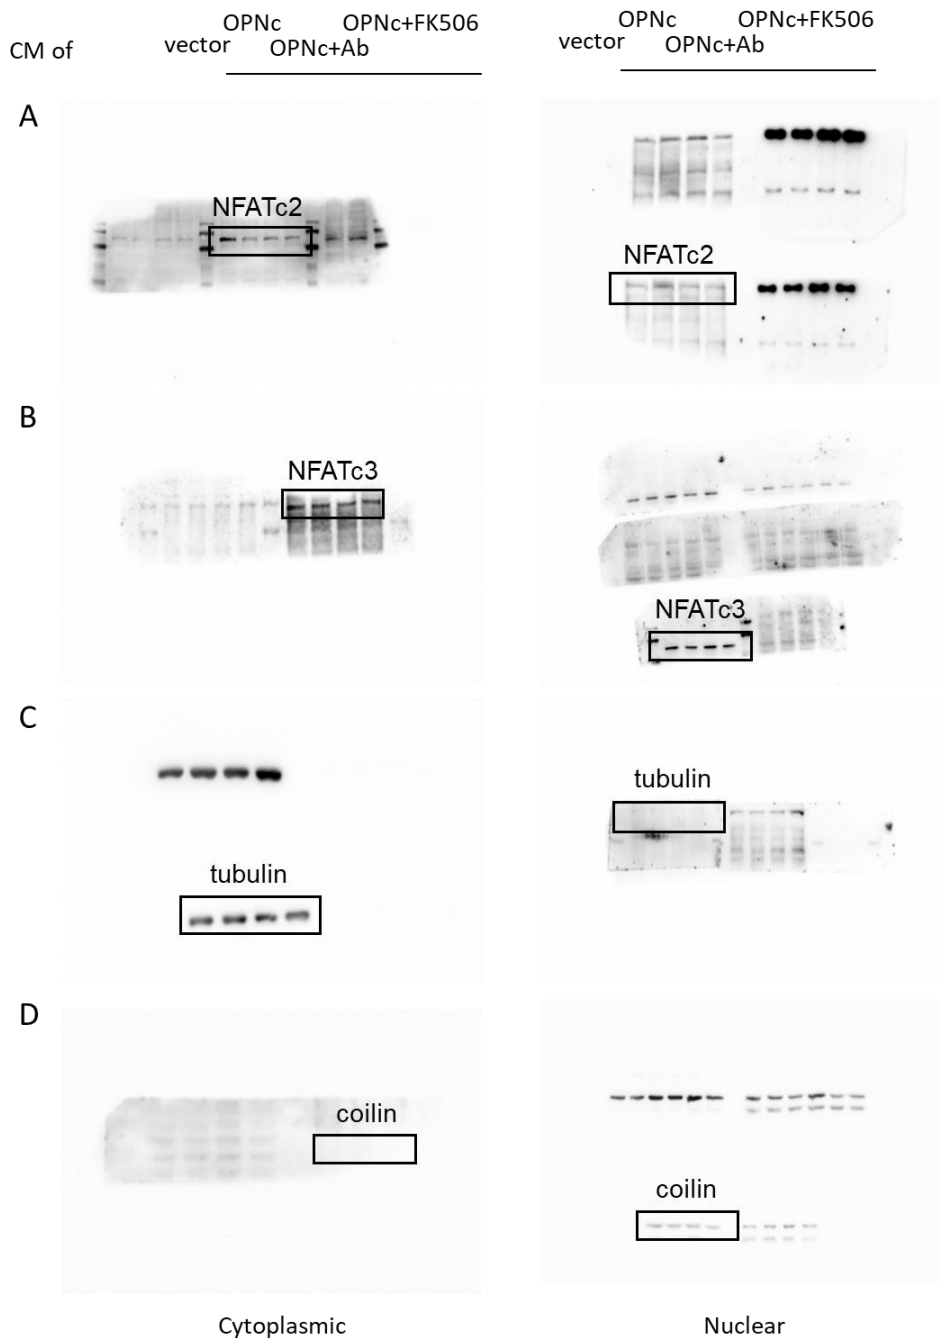

**Suppl Figure 4 (Original images to Figure 3D).** (A) Original image to Figure 3D-NFATc2. (B) Original image to Figure 3D-NFATc3. (C) Original image to Figure 3D-tubulin. (D) Original image to Figure 3D-coilin.

Suppl Figure 5 (Original images to Figure 6C)

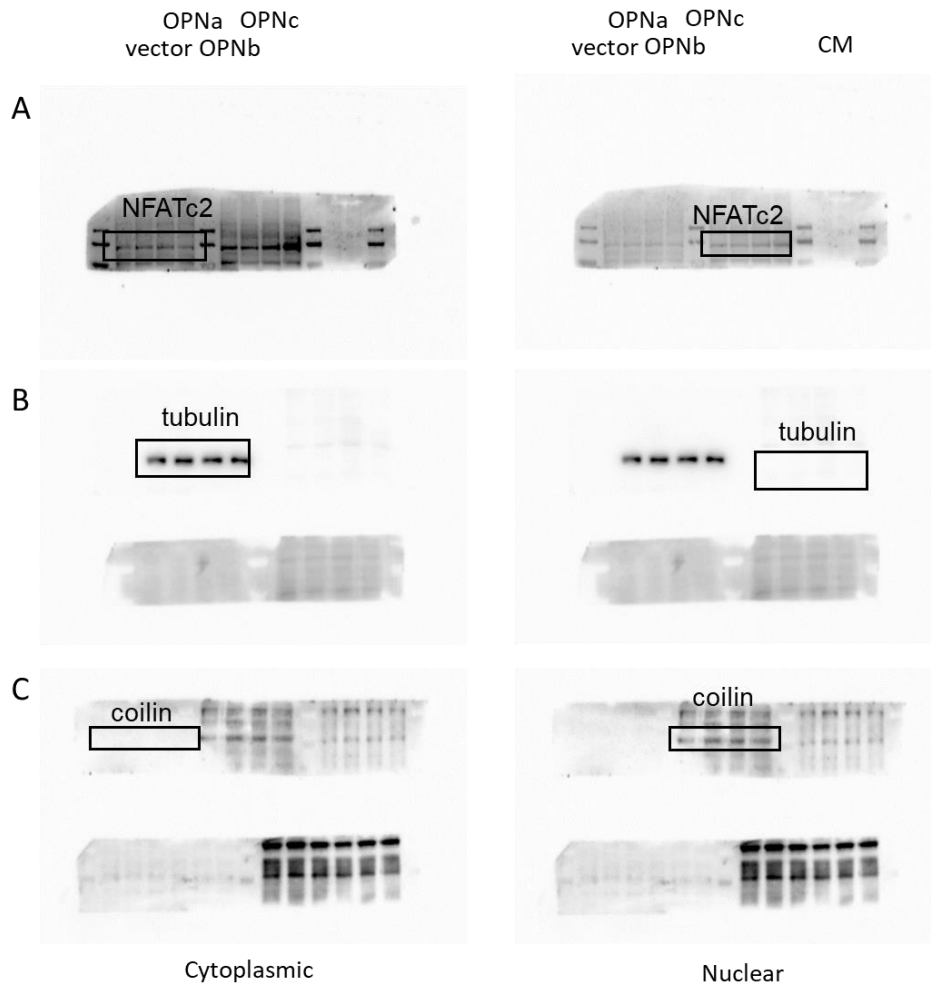

**Suppl Figure 5 (Original images to Figure 6C).** (A) Original image to Figure 6C-NFATc2. (B) Original image to Figure 6C-tubulin. (C) Original image to Figure 6C-coilin.

Suppl Figure 6

(Original images to Supplement Figure 1 and Supplement Figure 2)

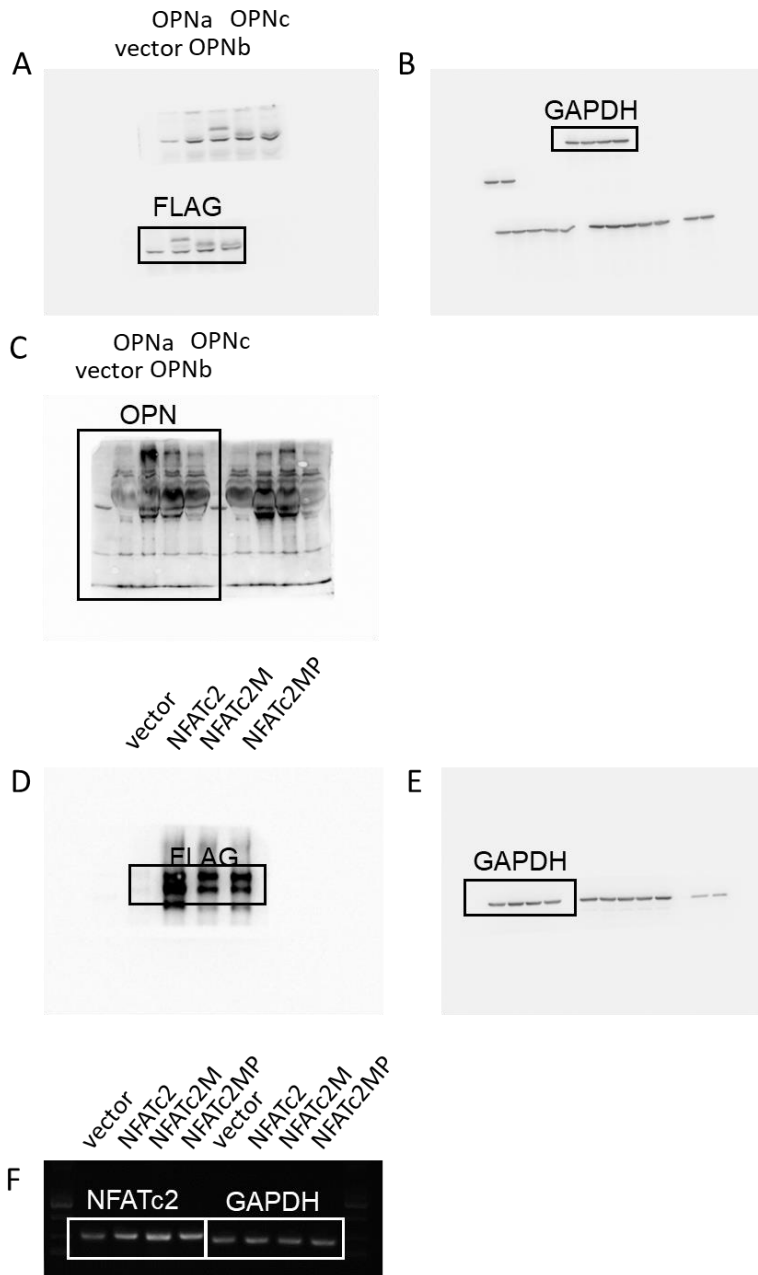

**Suppl Figure 6 (Original images to Supplement Figure 1 and Supplement Figure 2).** (A) Original image to Supplement Figure 1A-FLAG. (B) Original image to Supplement Figure 1A-GAPDH. (C) Original image to Supplement Figure 1B-OPN. (D) Original image to Supplement Figure 2A-FLAG. (E) Original image to Supplement Figure 2A-GAPDH. (F) Original image to Supplement Figure 2B-NFATc2 and GAPDH.
